# Supplementary material for: Genome-Wide Analysis Reveals Diversity of Rice Intronic miRNAs in Sequence Structure, Biogenesis and Function
Source: PLoS One. 2013 May 22;8(5):e63938. doi: 10.1371/journal.pone.0063938 (PMC3661559; doi:10.1371/journal.pone.0063938)
Supplement: Table S1 — Descriptions of eight small RNA sequencing samples used in our study. (XLS) [file pone.0063938.s006.xls]

## Sheet: samples
Table S1. Descriptions of Eight Small RNA Sequencing Samples used in our study.
Sample	GSM	Subspecific	Tissues	Stage	Raw Format	RAW reads/tags	Mapped reads/tags	MySQL reads/tags
1	GSM278571	Japonica Group	Grains	1-5DAFa	Scarf	3428861/1593541	2963375/1239641	2727537/1069018
2	GSM278572	Japonica Group	Grains	6-10DAF	Scarf	3412945/1547469	2857403/1224883	2610522/1041850
3	GSM455965	Japonica Group	Seeding	3 week	Illumina-fastq	5898238/3439780	4860499/2675711	4115641/2159827
4	GSM520640	Japonica Group	Seeding	3 week	Illumina-fastq	9253213/3296663	6604148/2179920	5983281/1772100
5	GSM489087	Japonica Group	seedling shoot	4 week	Sanger-fastq	3401385/1550811	2394917/1145142	2083981/913445
6	GSM361264	Indica Group	Flag leafs	119days	Sanger-fastq	7956301/2522046	6487265/1712339	5791197/1362016
7	GSM722128	Indica Group	Pollen	tricellular	Illumina-fastq	13665389/3795643	10656649/2628717	9633619/2032599
8	GSM417540	Indica Group	8 tissuesb	development	Illumina-fastq	6079965/3442281	4566831/2352193	3834880/1882864
a: DAF, days after fertilization
b: callus,seedling shoot,seedling root,tillering leaf,flowering panicle,flowering leaf,filling panicle and booting panicle
